# Supplementary material for: Graphdiyne-modified TiO2 nanofibers with osteoinductive and enhanced photocatalytic antibacterial activities to prevent implant infection
Source: Nat Commun. 2020 Sep 8;11:4465. doi: 10.1038/s41467-020-18267-1 (PMC7479592; doi:10.1038/s41467-020-18267-1)
Supplement: Supplementary file 1 — Supplementary Information [file 41467_2020_18267_MOESM1_ESM.pdf]

## **Supplementary Information**

### **Graphdiyne-Modified TiO<sub>2</sub> Nanofibers with Enhanced Photocatalytic Antibacterial and Osteoinductive Activities for Implant Infection**

**Wang and Shi et al.**

## Supplementary Figures

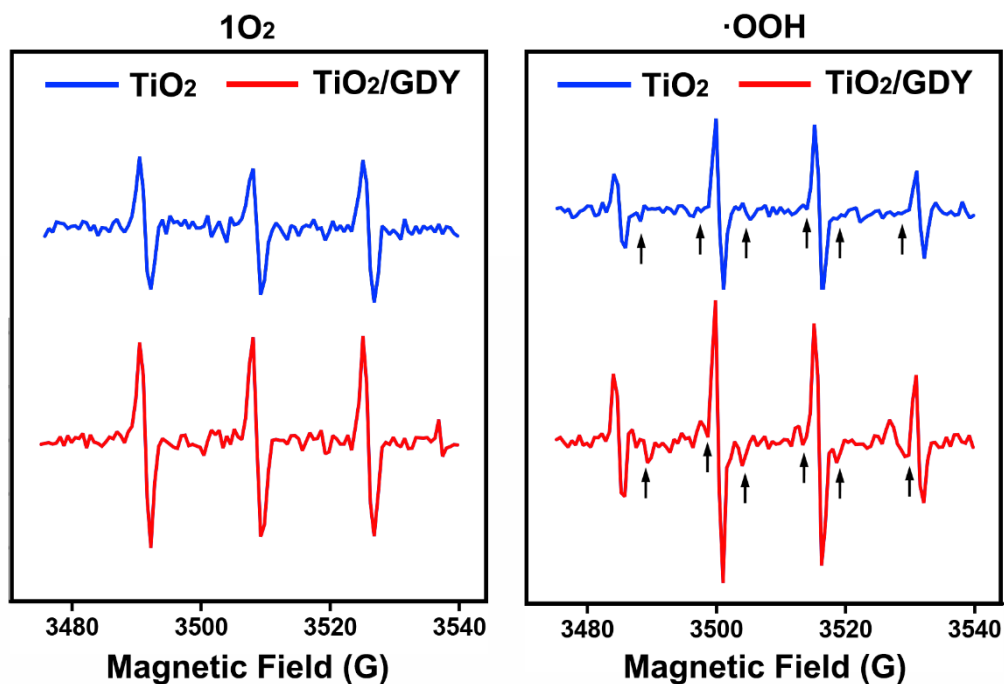

**Supplementary Fig. 1** ESR signals for  $^1\text{O}_2$  (left) and  $\cdot\text{OOH}$  (right) generation in water after  $\text{TiO}_2$  (blue) and  $\text{TiO}_2/\text{GDY}$  (red) were irradiated and activated by 300 W Xe lamp. 2,2,6,6-tetramethyl-piperidine (TEMP) and DMPO were used as trapping reagent for  $^1\text{O}_2$  and  $\cdot\text{OOH}$ , respectively. The measurement was performed in water using ESR (Bruke, a300) at room temperature. Black arrows in the right indicate the peaks of  $\cdot\text{OOH}$ . Source data are provided as a Source Data file.

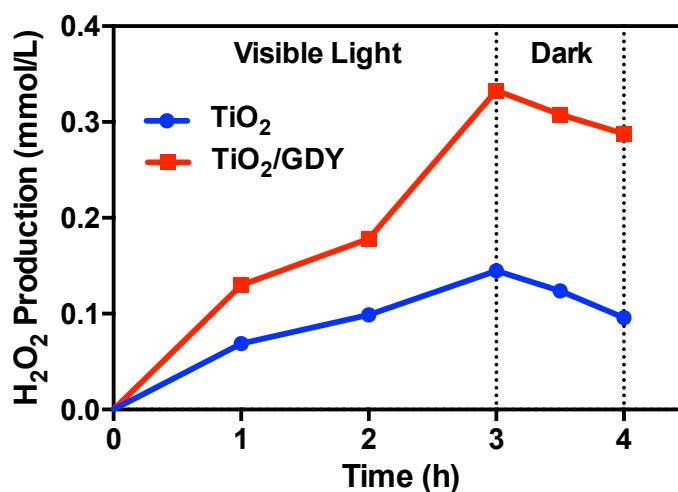

**Supplementary Fig. 2** The concentration-time curves of photocatalytic  $\text{H}_2\text{O}_2$  production in water in the presence of  $\text{TiO}_2$  and  $\text{TiO}_2/\text{GDY}$  with 3-hour 300 W Xe lamp irradiation and 1-hour darkness afterwards. The  $\text{H}_2\text{O}_2$  generation was tested through ferric ion titration method. 15 mg nanofiber photocatalysts in 15 mL  $\text{H}_2\text{O}$  were mixed and stirred in darkness for 30 min, then bubbled with  $\text{O}_2$  for 30 min to obtain an  $\text{O}_2$  equilibrated environment. After 300 W Xe lamp irradiation, the  $\text{H}_2\text{O}_2$  concentration in the mixed solution was measured every 1 hour. Also, the  $\text{H}_2\text{O}_2$  concentration was also measured after turning off the light in dark at 30 and 60 min. Source data are provided as a Source Data file.

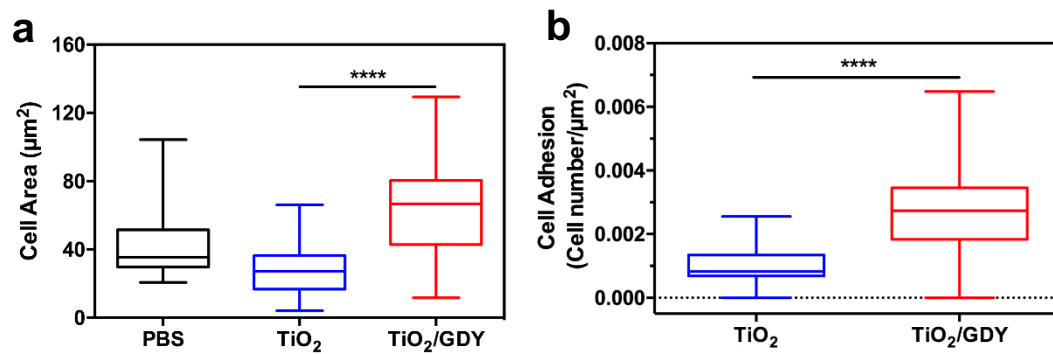

**Supplementary Fig. 3 (a)** Cell area calculation from Figure. 2a cytoskeleton staining images by Image J (n=25 cells examined over 3 independent experiments). **(b)** Adhered cell number per material area (n =35). The data are shown with medians and quartiles between maximums and minimums (one-way ANOVA was applied for statistical analysis, \*\*\*\*p<0.0001). The distribution of cell areas showed that cells on TiO<sub>2</sub>/GDY was more spreading than on TiO<sub>2</sub>. Cell calculation by DAPI staining exhibited there were significantly more cells adhered on TiO<sub>2</sub>/GDY than on TiO<sub>2</sub> per area. Source data are provided as a Source Data file.

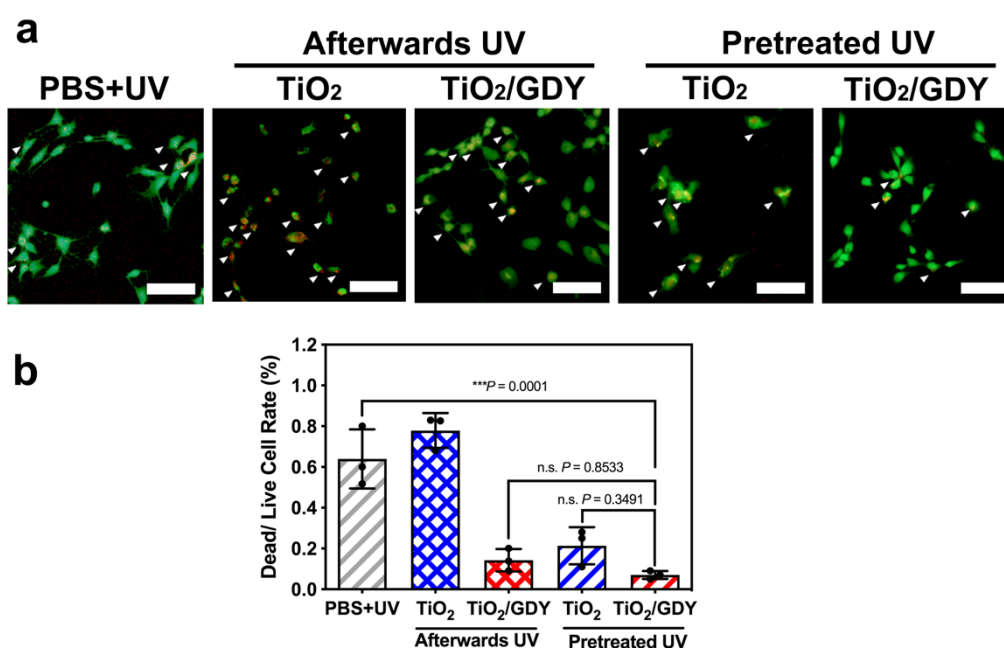

**Supplementary Fig. 4 Live/dead staining of cells treated with UV irradiated nanofibers.** “Afterwards UV” represents nanofibers added to MC3T3-E1 cells then received UV irradiation together with cells, while “Pretreated UV” represents nanofibers received UV irradiation before added to cells. **(a)** Calcein AM (green) for live cells and PI (red) for dead and apoptosis cells. White arrowheads indicate cells close to death with PI staining in nucleus. (scale bar = 100  $\mu$ m). **(b)** Semi-quantitative analysis of the live/dead staining. The data are shown as mean  $\pm$  S. D., error bars = Standard Deviation (n=3 independent experiments) (one-way ANOVA was applied for statistical analysis, \*p<0.05, \*\* p<0.01, \*\*\*p<0.001). Source data of (b) are provided as a Source Data file.

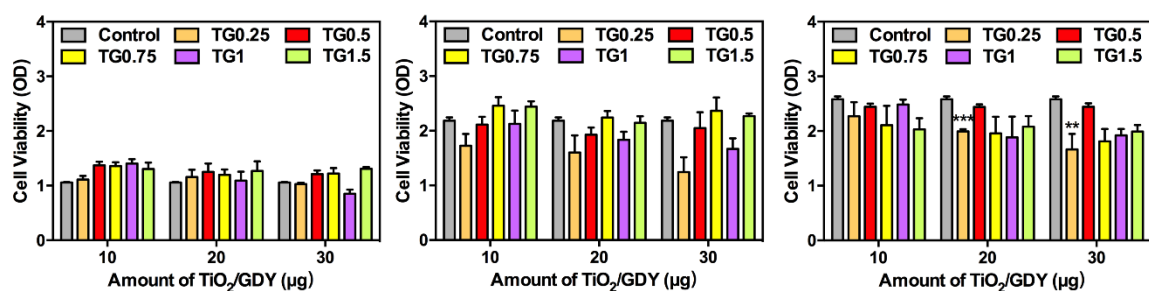

**Supplementary Fig. 5 Cell proliferation assay of different ratios of  $\text{TiO}_2/\text{GDY}$  *in vitro*.** (a) For CCK-8 analysis, MC3T3-E1 cells cultivated with different ratios of  $\text{TiO}_2/\text{GDY}$  (TG0.25, TG0.5, TG0.75, TG1, TG1.5) and PBS as control for 1, 3, 5 days from left to right. The data are shown as mean  $\pm$  S. D. Error bars = Standard Deviation (n=3 independent experiments). Source data are provided as a Source Data file.

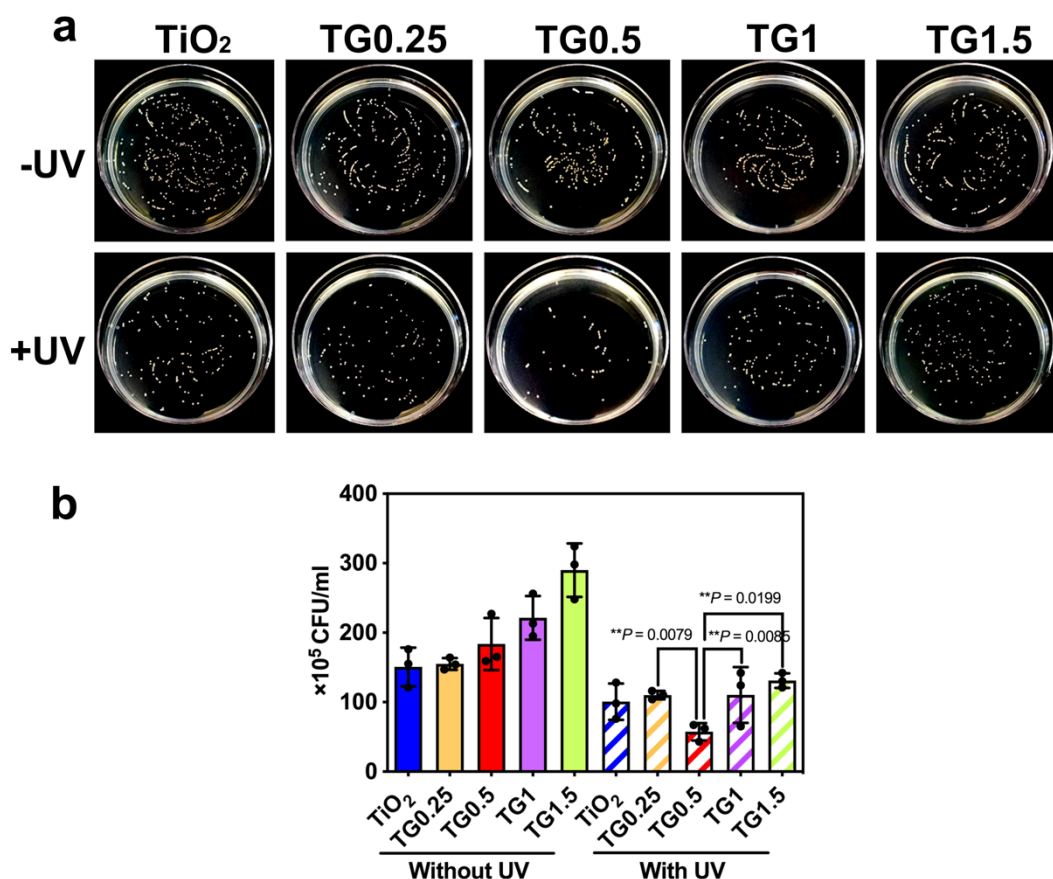

**Supplementary Fig. 6 Photocatalytic antibacterial properties of different ratios of TiO<sub>2</sub>/GDY *in vitro*.** MRSA treated with TiO<sub>2</sub> or different ratios of TiO<sub>2</sub>/GDY (TG0.25, TG0.5, TG1, TG1.5) nanofibers, with or without UV (365 nm, 2mW cm<sup>-1</sup>) irradiation. **(a, b)** Photo and quantitative analysis of bacteria colony of MRSA and the data in b) are shown as mean ± S. D., error bars = Standard Deviation (n =3 independent experiments, one-way ANOVA was applied for statistical analysis, \*p<0.05, \*\* p<0.01, \*\*\*p<0.001). Source data of (b) are provided as a Source Data file.

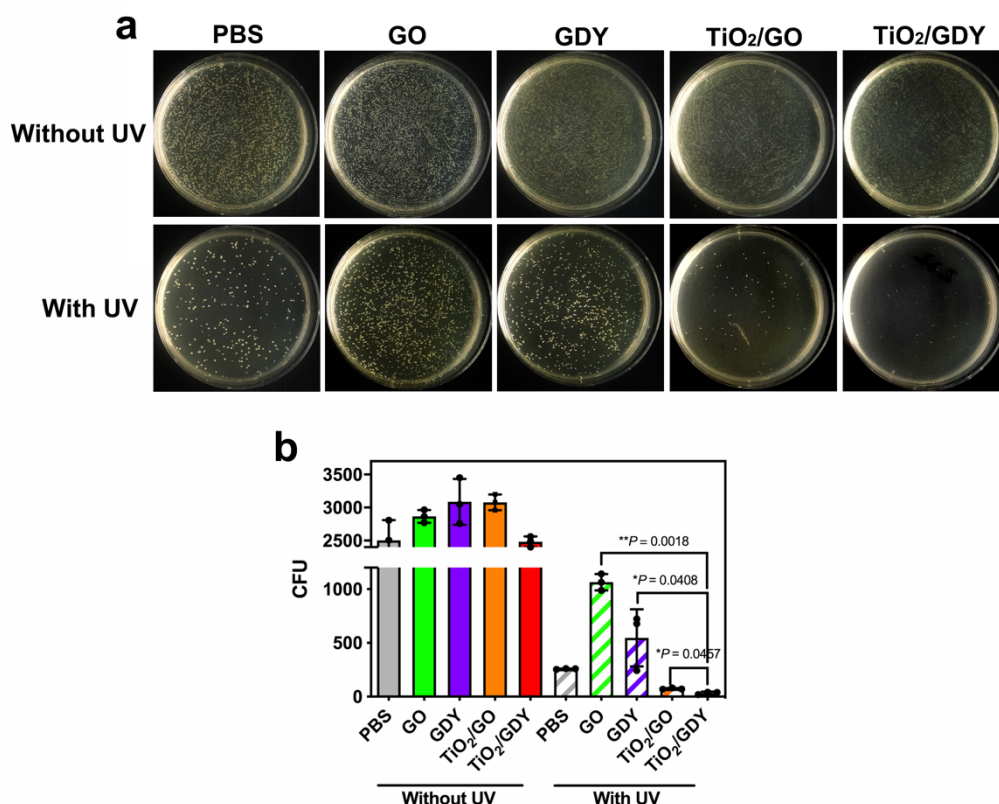

**Supplementary Fig. 7 Photocatalytic antibacterial properties of GO, GDY, TiO<sub>2</sub>/GO and TiO<sub>2</sub>/GDY *in vitro*.** MRSA treated with GO, GDY, TiO<sub>2</sub>/GO and TiO<sub>2</sub>/GDY, with or without UV (365 nm, 2 mW cm<sup>-1</sup>) irradiation. **(a, b)** Photo and quantitative analysis of bacteria colony of MRSA and the data in b) are shown as mean  $\pm$  S. D., error bars = Standard Deviation (n =3 independent experiments, one-way ANOVA was applied for statistical analysis, \*p<0.05, \*\* p<0.01, \*\*\*p<0.001). Source data of (b) are provided as a Source Data file.

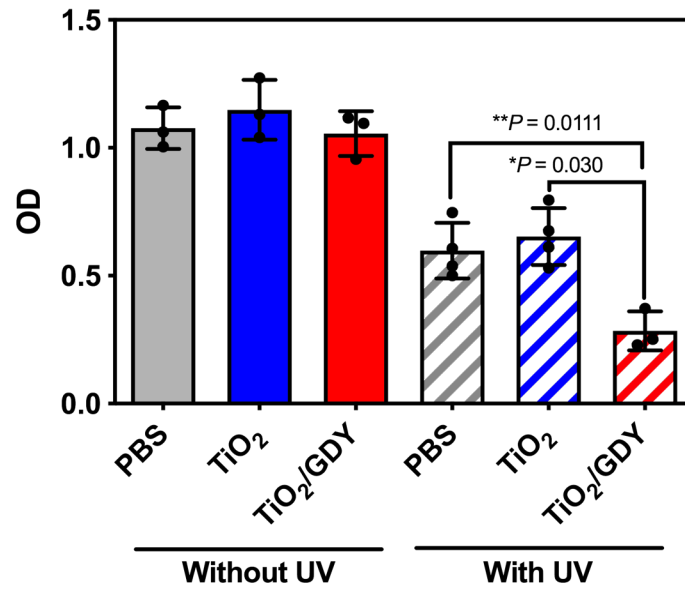

**Supplementary Fig. 8 Crystal violet staining of biofilm formation.** MRSA treated with TiO<sub>2</sub> or TiO<sub>2</sub>/GDY nanofibers then received UV irradiation or not. Absorbance at 590 nm of crystal violet staining of biofilms were measured. Data are shown as mean  $\pm$  S. D., error bars = Standard Deviation (n =3 independent experiments, one-way ANOVA was applied for statistical analysis, \*p<0.05, \*\*p<0.01). Source data are provided as a Source Data file.

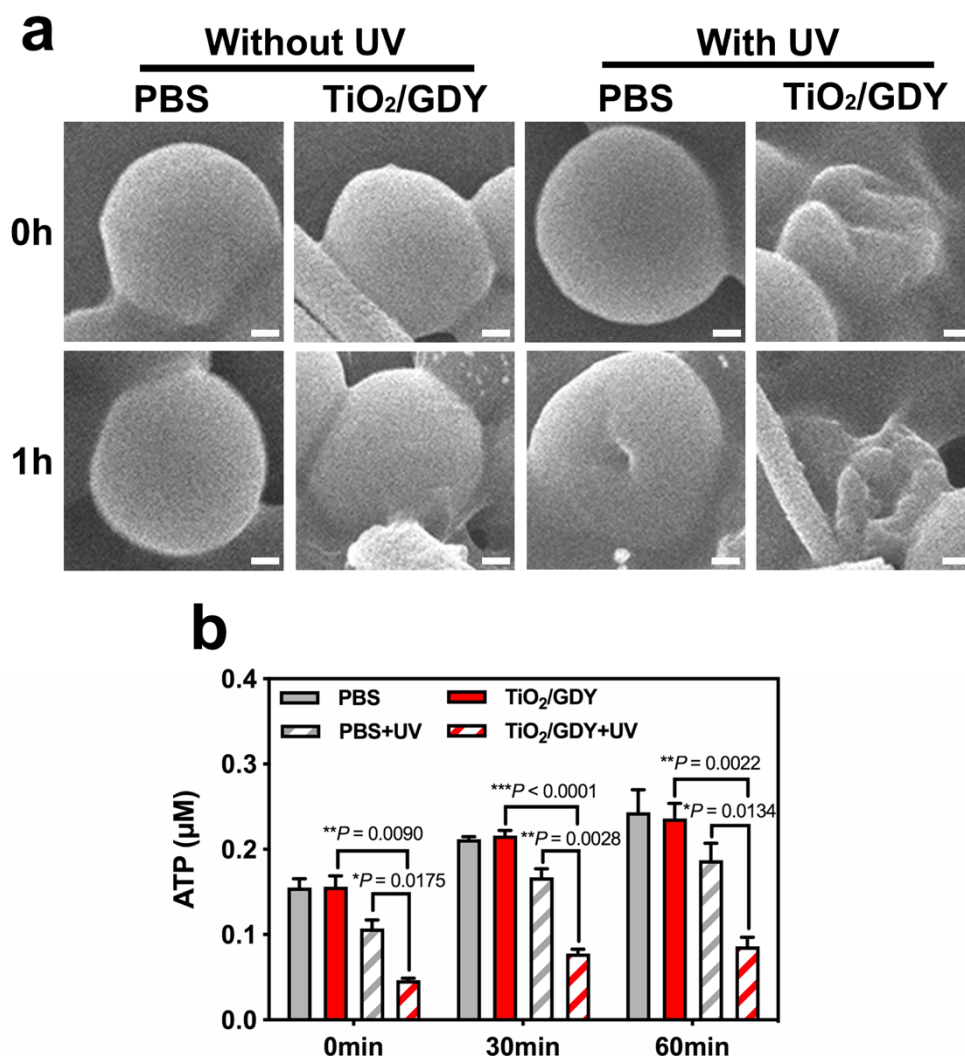

**Supplementary Fig. 9 Mechanism in photocatalytic antibacterial effect. (a)** SEM images of MRSA after photocatalytic treatment.  $10^9$  CFU mL<sup>-1</sup> MRSA treated with TiO<sub>2</sub>/GDY nanofibers then received 1 hour of UV irradiation or not. Bacteria were observed immediately (0 h) or incubated in 37 °C for 1 h before observation (1 h). Scale bar = 100 nm. **(b)** ATP level in bacteria after TiO<sub>2</sub>/GDY treatment with or without UV irradiation. The ATP levels 0, 30, 60 min after treatment were measured. The data in (b) are shown as mean  $\pm$  S. D., error bars = Standard Deviation (n =3 independent experiments, two-way ANOVA was applied for statistical analysis, \* $p$ <0.05, \*\* $p$ <0.01, \*\*\* $p$ <0.001) Source data of (b) are provided as a Source Data file.

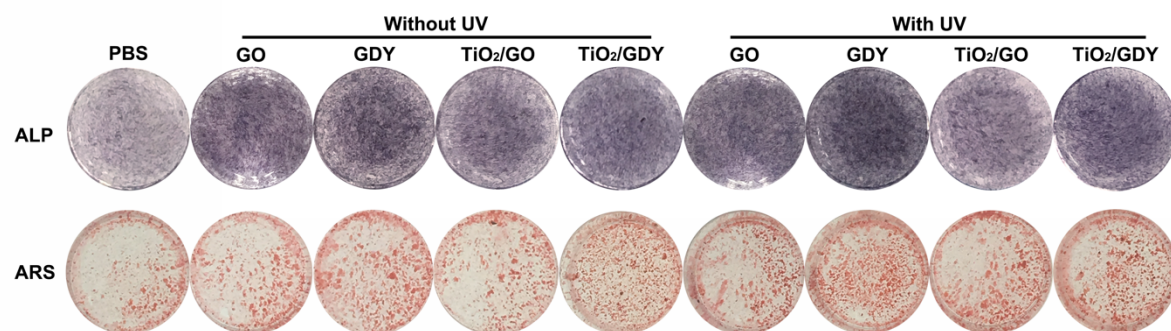

**Supplementary Fig. 10 ALP and ARS Staining of MC3T3-E1 cells *in vitro*.** Cells were treated with GO, GDY, TiO<sub>2</sub>/GO and TiO<sub>2</sub>/GDY, with or without UV (365 nm, 2 mW cm<sup>-1</sup>) irradiation. After 14-day osteogenic induction, ALP staining (upper) and Alizarin red staining (lower) were conducted.

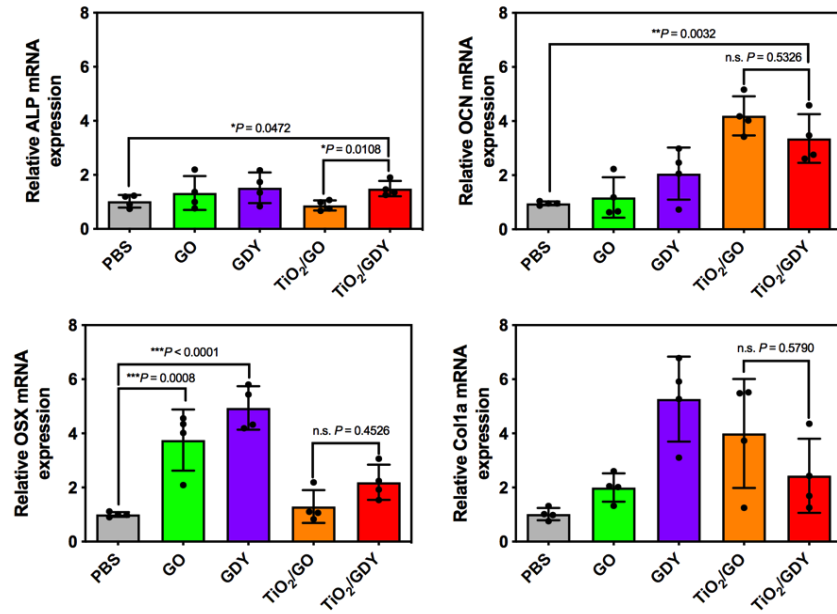

**Supplementary Fig. 11 Real time qPCR analysis on expression of Alp, Ocn, Osx and Col1a levels in MC3T3-E1 *in vitro*.** MC3T3-E1 cells treated with GO, GDY, TiO<sub>2</sub>/GO and TiO<sub>2</sub>/GDY with 7-day osteogenic induction. Data are shown as mean  $\pm$  S. D., error bars = Standard Deviation (n=4 independent experiments, one-way ANOVA was applied for statistical analysis, \*p<0.05, \*\* p<0.01, \*\*\*p<0.001, n. s.= not significant). Source data are provided as a Source Data file.

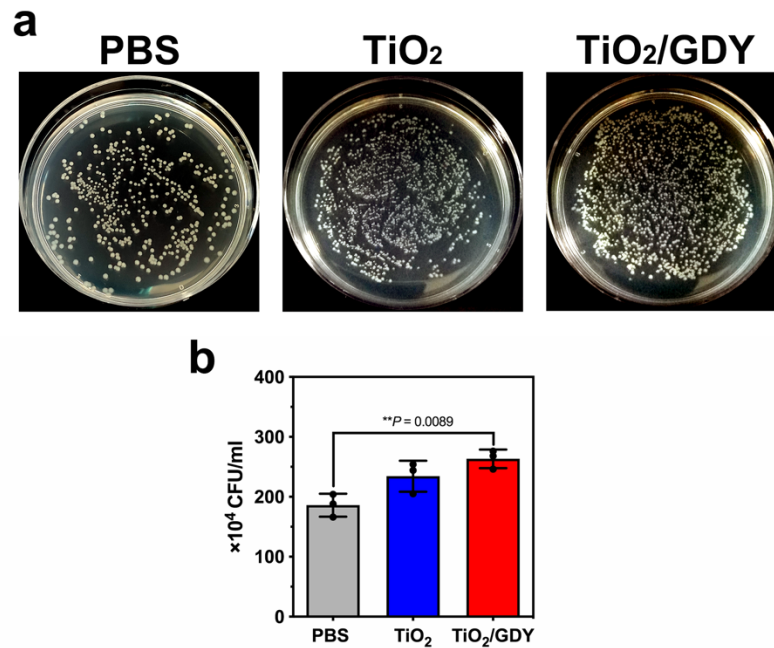

**Supplementary Fig. 12 Antibacterial effect of infected  $\text{TiO}_2$  and  $\text{TiO}_2/\text{GDY}$  in the mouse implant-associated infection model without UV irradiation. (a, b)** Photographs and quantitative analysis of the MRSA bacterial colonies of the infected femurs treated with  $\text{TiO}_2$ ,  $\text{TiO}_2/\text{GDY}$  or PBS as control 5 days after surgery, without UV irradiation. The data are shown as mean  $\pm$  S. D., error bars = Standard Deviation (n =3 independent experiments, one-way ANOVA was applied for statistical analysis, \*p<0.05). Source data of (b) are provided as a Source Data file.

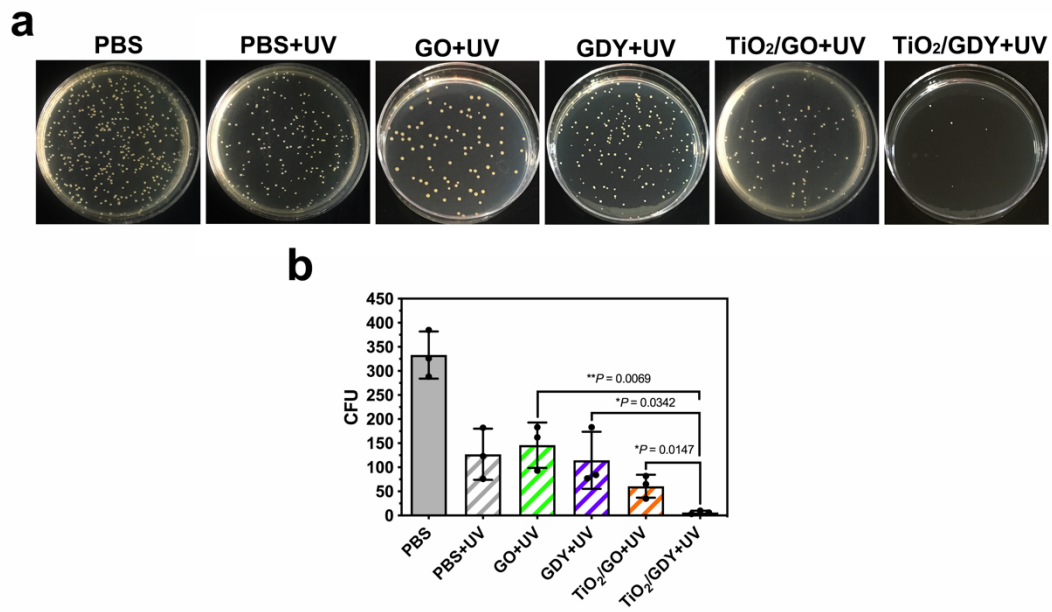

**Supplementary Fig. 13 Antibacterial effect of infected GO, GDY, TiO<sub>2</sub>/GO and TiO<sub>2</sub>/GDY in the mouse implant-associated infection model with UV irradiation.** (a, b) Photographs and quantitative analysis of the MRSA bacterial colonies in the defected femurs 5 days after implanted with MRSA infected GO, GDY, TiO<sub>2</sub>/GO, TiO<sub>2</sub>/GDY or PBS with UV irradiation. The data are shown as mean  $\pm$  S. D., error bars = Standard Deviation (n =3 biological independent samples, one-way ANOVA was applied for statistical analysis, \*p<0.05, \*\* p<0.01). Source data of (b) are provided as a Source Data file.

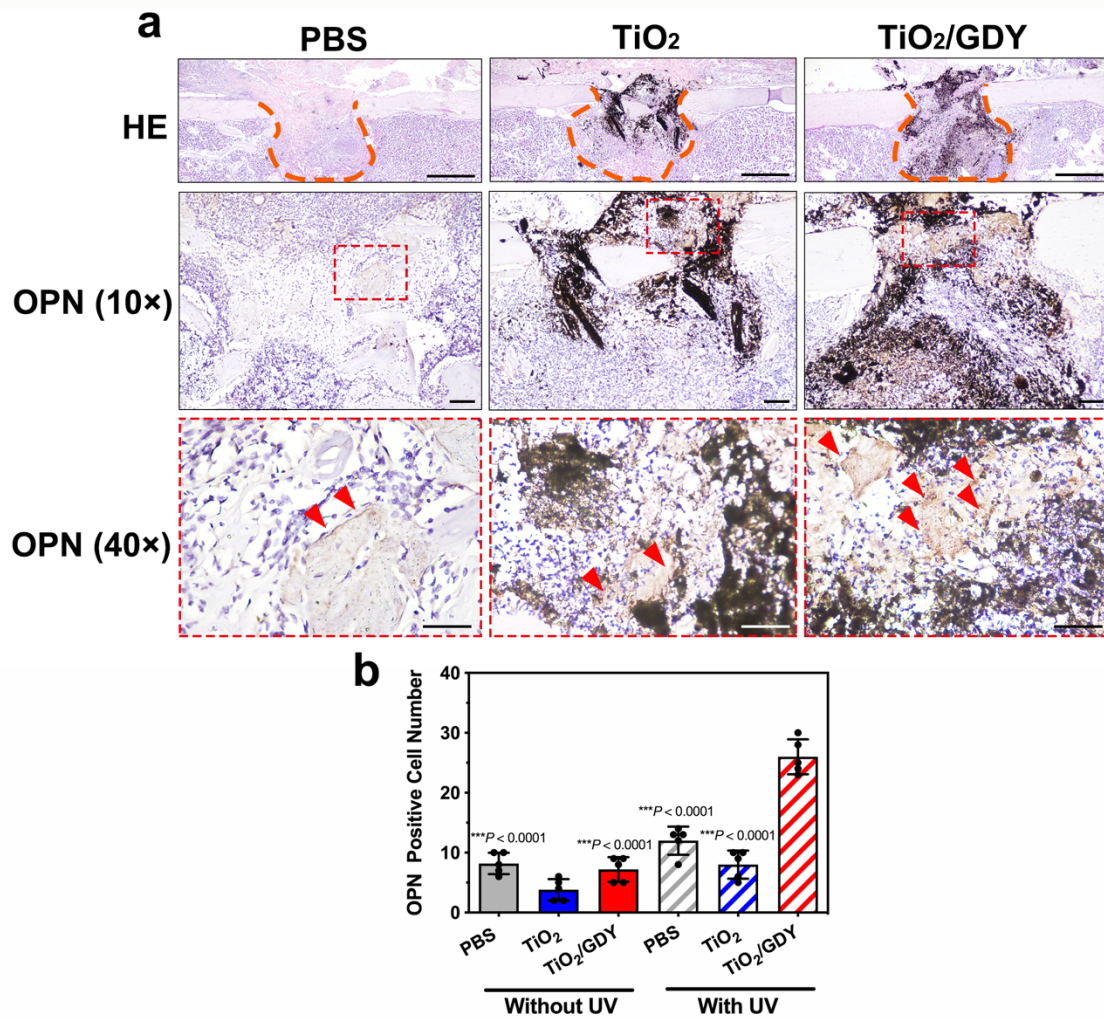

**Supplementary Fig. 14 Histomorphological analysis of infected TiO<sub>2</sub> and TiO<sub>2</sub>/GDY in the mouse implant-associated infection model without UV irradiation. (a)** H&E staining and immunohistochemical analysis of OPN images for infection and bone formation after implanted with MRSA infected TiO<sub>2</sub> or TiO<sub>2</sub>/GDY nanofibers 5 days, without UV irradiation. Orange dot lines in H&E images represent infectious and necrotic areas (scale bar = 500  $\mu$ m). OPN 10 $\times$ : scale bar = 100  $\mu$ m ; OPN 40 $\times$ : scale bar = 50  $\mu$ m; red arrowheads point out OPN positive osteoblasts. **(b)** Counting of OPN positive cell numbers in the IHC images of both UV and without UV groups. The data are shown as mean  $\pm$  S. D., error bars = Standard Deviation (n=5 biological independent samples) (all groups were compared to TiO<sub>2</sub>/GDY+UV group for statistical analysis, one-way ANOVA was applied for statistical analysis, \*p<0.05, \*\* p<0.01, \*\*\*p<0.001). Source data of (b) are provided as a Source Data file.

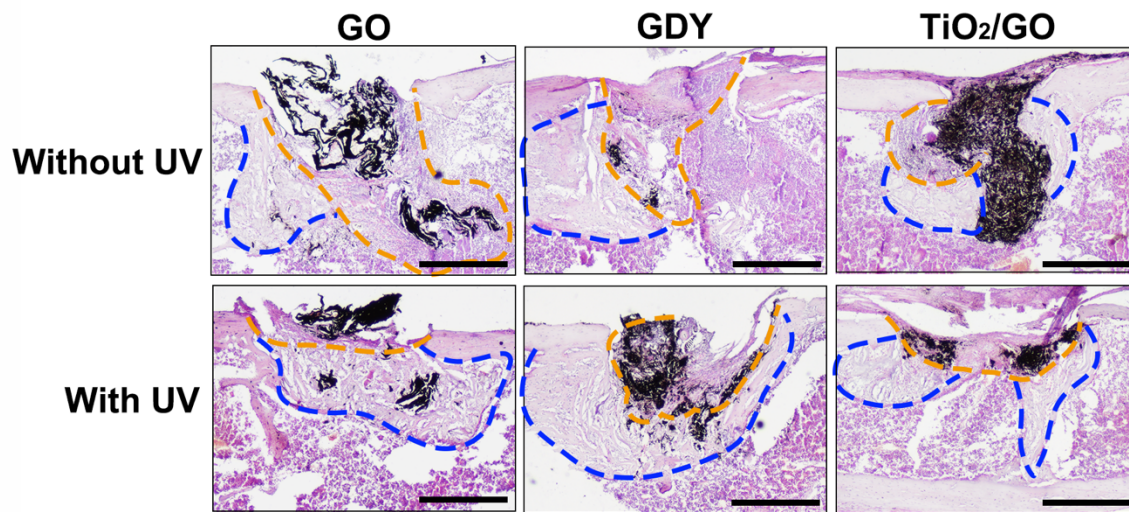

**Supplementary Fig. 15 H&E staining of infected GO, GDY and TiO<sub>2</sub>/GO in the mouse implant-associated infection model with or without UV irradiation.** Images for infection and bone formation 5 days after implanted with MRSA infected GO, GDY or TiO<sub>2</sub>/GO with or without UV irradiation. Orange dotted lines represent infectious and necrotic areas; between the orange and blue dotted lines are new bone formation areas (n =3) (scale bar = 500  $\mu$ m).

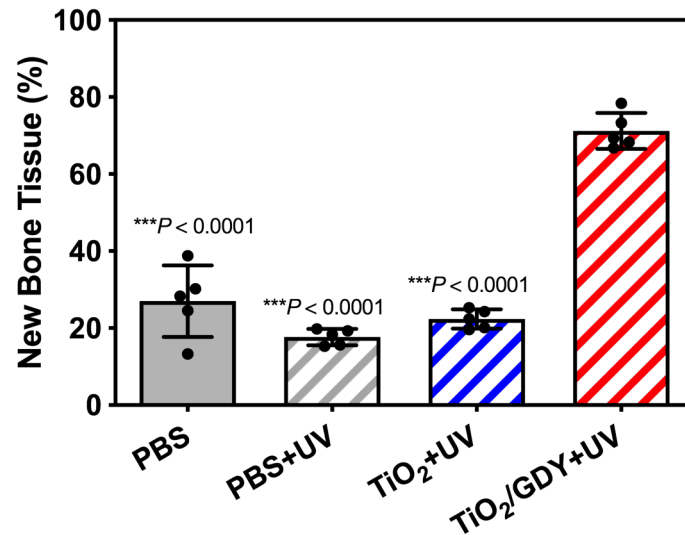

**Supplementary Fig. 16 Histomorphological analysis of bone regeneration 4 weeks after implement of mouse implant-associated infection model. (a)** Semi-quantitative assay of new bone formation with the percentage of blue area in the dot-lined boxed on Masson staining images. The data are shown as mean  $\pm$  S. D., error bars = Standard Deviation (n =5 biological independent samples, one-way ANOVA was applied for statistical analysis, \* denotes the significant difference compared to TiO<sub>2</sub>/GDY group  $p < 0.05$ , \*\*  $p < 0.01$ , \*\*\* $p < 0.001$ ). Source data are provided as a Source Data file.

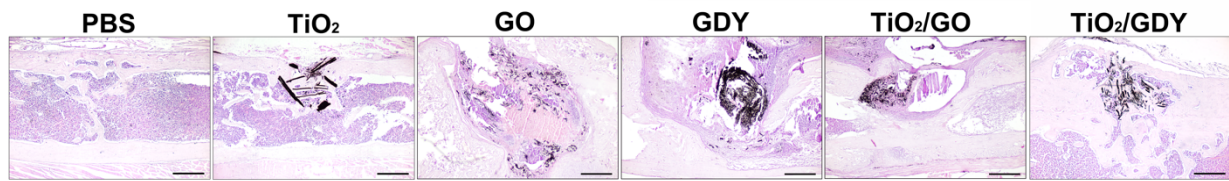

**Supplementary Fig. 17 H&E staining of bone regeneration 4 weeks after implement of mouse implant-associated infection model.** Femurs were implanted with MRSA infected GO, GDY, TiO<sub>2</sub>/GO, TiO<sub>2</sub>, TiO<sub>2</sub>/GDY, or PBS as control with prior UV irradiation. Scale bar = 500  $\mu$ m. (n=3 biological independent samples)

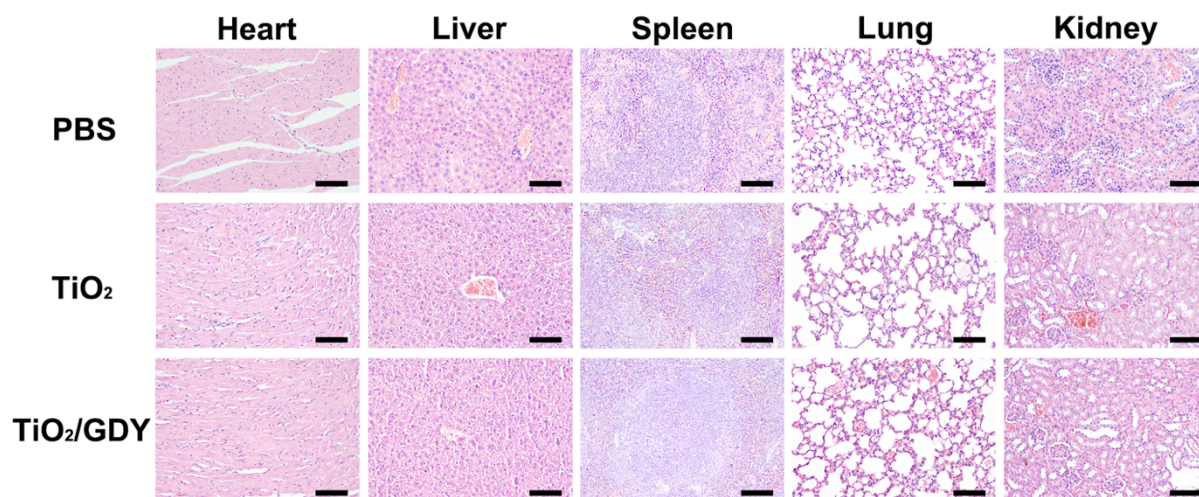

**Supplementary Figure. 18 H&E staining of organs in mouse implant-associated infection model.** Heart, liver, spleen, lung and kidney in mice implanted with TiO<sub>2</sub> or TiO<sub>2</sub>/GDY nanofibers for 4 weeks. PBS as the control group. (n = 3) (scale bar = 100 μm).
